# Supplementary material
Source: PubMed Central journal article supplement (PMC3323798)
Supplement: cc1105_0998SD1.pdf [file cc1105_0998SD1.pdf]

**Supplemental Materials for:**

**Telomere proteins POT1, TRF1 and TRF2 augment long-patch base excision repair  
in vitro**

**Adam S. Miller,<sup>1</sup> Lata Balakrishnan,<sup>1</sup> Noah A. Buncher,<sup>2</sup> Patricia L. Opresko<sup>2,\*</sup> and  
Robert A. Bambara<sup>1,\*</sup>**

**ABSTRACT**

Human telomeres consist of multiple tandem hexameric repeats, each containing a guanine triplet. Guanosine-rich clusters are highly susceptible to oxidative base damage, necessitating base excision repair (BER). Previous demonstration of enhanced strand displacement synthesis by the BER component DNA polymerase  $\beta$  in the presence of telomere protein TRF2 suggests that telomeres employ long-patch (LP) BER. Earlier analyses in vitro showed that efficiency of BER reactions is reduced in the DNA-histone environment of chromatin. Evidence presented here indicates that BER is promoted at telomeres. We found that the three proteins that contact telomere DNA, POT1, TRF1 and TRF2, enhance the rate of individual steps of LP-BER and stimulate the complete reconstituted LP-BER pathway. Thought to protect telomere DNA from degradation, these proteins still apparently evolved to allow selective access of repair proteins.

**Supplemental Figures 1-5 followed by Supplemental Table 1.**

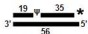

### Non-Telomeric Abasic Substrate

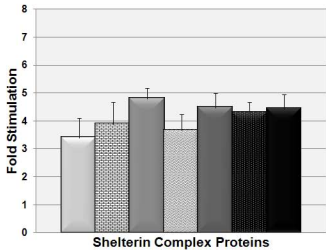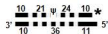

### Telomeric Abasic Substrate

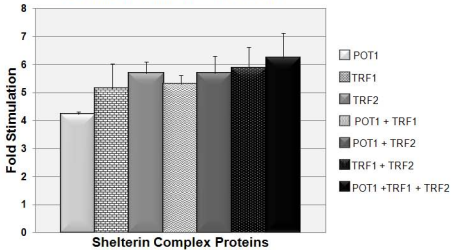

- POT1
- ▨ TRF1
- ▩ TRF2
- ▧ POT1 + TRF1
- ▦ POT1 + TRF2
- ▤ TRF1 + TRF2
- POT1 + TRF1 + TRF2

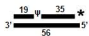

### Non-Telomeric Abasic Substrate

|      |   |   |   |   |   |   |   |   |   |   |   |   |   |   |   |   |   |   |
|------|---|---|---|---|---|---|---|---|---|---|---|---|---|---|---|---|---|---|
| TRF2 | - | - | - | + | - | - | - | - | - | - | - | - | - | - | - | - | ▲ | - |
| TRF1 | - | - | - | + | - | - | - | - | - | - | - | ▲ | - | - | - | - | - | - |
| POT1 | - | + | - | - | - | - | - | - | - | - | - | - | ▲ | - | - | - | - | - |
| APE1 | - | - | - | - | + | + | + | + | + | + | + | + | + | + | + | + | + | + |

Wells →

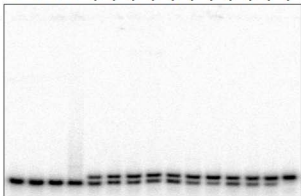

| Lane       | 1 | 2 | 3 | 4 | 5  | 6   | 7  | 8  | 9  | 10 | 11 | 12 | 13 | 14 | 15  |
|------------|---|---|---|---|----|-----|----|----|----|----|----|----|----|----|-----|
| % Bound    |   |   |   |   | 44 | 51  | 59 | 60 | 51 | 57 | 76 | 57 | 63 | 73 | 100 |
| Fold Stim. |   |   |   |   |    | 1.4 |    |    |    | 2  |    |    |    |    |     |

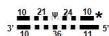

### Telomeric Abasic Substrate

|      |   |   |   |   |   |   |   |   |   |   |   |   |   |   |   |   |   |   |
|------|---|---|---|---|---|---|---|---|---|---|---|---|---|---|---|---|---|---|
| TRF2 | - | - | - | + | - | - | - | - | - | - | - | - | - | - | - | - | ▲ | - |
| TRF1 | - | - | - | + | - | - | - | - | - | - | - | - | - | ▲ | - | - | - | - |
| POT1 | - | + | - | - | - | - | - | - | - | - | - | - | - | - | ▲ | - | - | - |
| APE1 | - | - | - | - | + | + | + | + | + | + | + | + | + | + | + | + | + | + |

Wells →

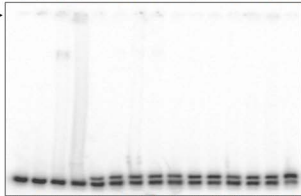

| Lane       | 1 | 2 | 3 | 4 | 5  | 6  | 7  | 8  | 9  | 10 | 11 | 12 | 13 | 14 | 15 |
|------------|---|---|---|---|----|----|----|----|----|----|----|----|----|----|----|
| % Bound    |   |   |   |   | 28 | 36 | 42 | 44 | 40 | 47 | 52 | 37 | 43 | 46 | 71 |
| Fold Stim. |   |   |   |   |    | 2  |    |    |    | 2  |    |    |    |    |    |

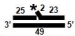

### 2-nt Non-Telomeric Flap Substrate

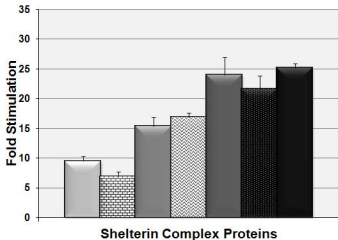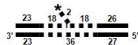

### 2-nt Telomeric Flap Substrate

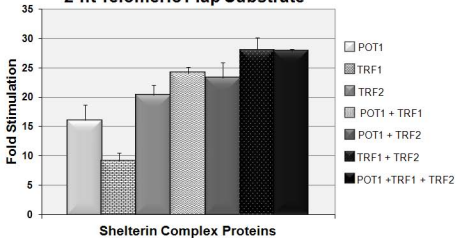

- POT1
- TRF1
- TRF2
- POT1 + TRF1
- POT1 + TRF2
- TRF1 + TRF2
- POT1 + TRF1 + TRF2

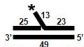

**13-nt Non-Telomeric Flap Substrate**

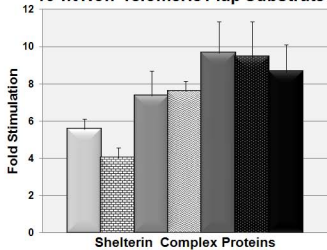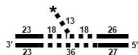

**13-nt Telomeric Flap Substrate**

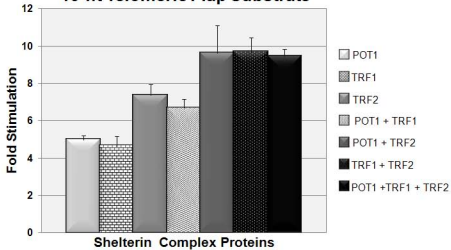

- POT1
- ▨ TRF1
- ▩ TRF2
- ▧ POT1 + TRF1
- ▦ POT1 + TRF2
- ▀ TRF1 + TRF2
- POT1 + TRF1 + TRF2

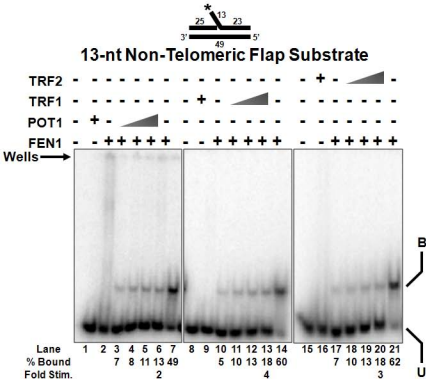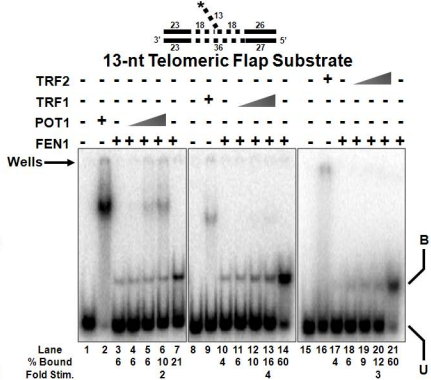

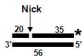

### Non-Telomeric Nicked Substrate

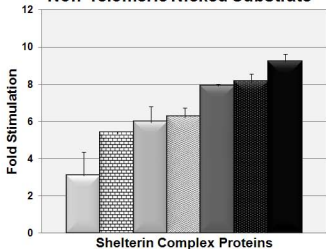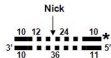

### Telomeric Nicked Substrate

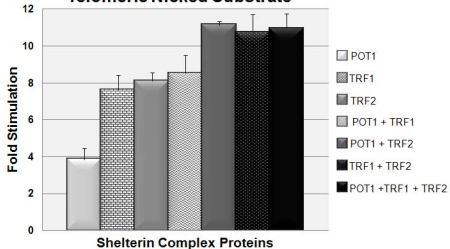

- POT1
- ▒ TRF1
- ▓ TRF2
- ▒ POT1 + TRF1
- ▓ POT1 + TRF2
- TRF1 + TRF2
- POT1 + TRF1 + TRF2

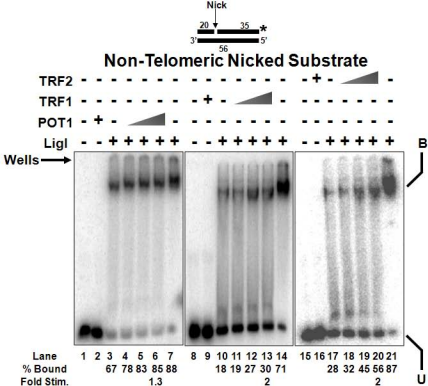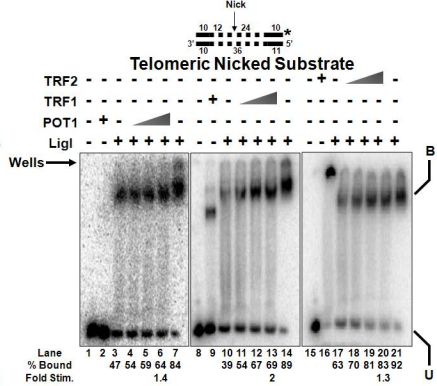



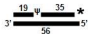

**Non-Telomeric Abasic Substrate**

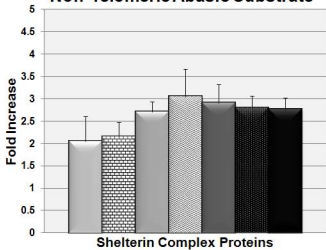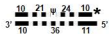

**Telomeric Abasic Substrate**

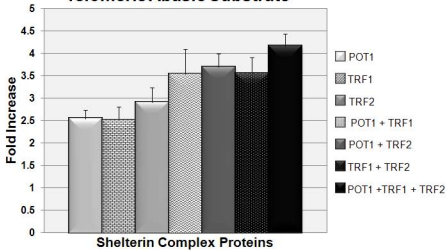

- POT1
- ▨ TRF1
- ▩ TRF2
- ▧ POT1 + TRF1
- ▦ POT1 + TRF2
- ▣ TRF1 + TRF2
- POT1 + TRF1 + TRF2

**Table 1. Oligonucleotide Sequences**

Ψ indicates a nucleotide containing a THF residue

| Primer            | Length(nts) | Sequence                                                                              |
|-------------------|-------------|---------------------------------------------------------------------------------------|
| <u>Upstream</u>   |             |                                                                                       |
|                   |             | <u>Listed 5' to 3'</u>                                                                |
| U1                | 25          | CGCCAGGGTTTCCCAGTCACGACC                                                              |
| U2                | 20          | CGACCGTGCCAGCCTAAAAC                                                                  |
| U3                | 22          | CGACCGTGCCTTAGGGTTAGGG                                                                |
| U4                | 41          | CTAGAACTGAGTGCCAGATAGCATTAGGGTTAGGGTTAGGG                                             |
| <u>Downstream</u> |             |                                                                                       |
|                   |             | <u>Listed 5' to 3'</u>                                                                |
| D1                | 25          | GTCGTTTTACAACGACGTGACTGGG                                                             |
| D2                | 36          | ATCACTGGCCGTCGTTTTACAACGACGTGACTGGG                                                   |
| D3                | 46          | GGTTAGGGTTAGGGTTAGGGTCCGATCGCCAGTCGCGTGCCTAGCG                                        |
| D4                | 57          | GGGTTAGGGAGGGTTAGGGTTAGGGTTAGGGTCCGATCGCCAGTCGCGTGCCTAGCG                             |
| D5                | 35          | ACTTGCCCGTGCCACCATCCCGACGCCACCTCCTG                                                   |
| D6                | 54          | CGACCGTGCCAGCCTAAAΨACTTGCCCGTGCCACCATCCCGACGCCACCTCCTG                                |
| D7                | 34          | TTAGGGTTAGGGTTAGGGTTAGGGCCACCTCCTG                                                    |
| D8                | 55          | CGACCGTGCCTTAGGGTTAGGGTTAGGGTTAΨGGTTAGGGTTAGGGCCACCTCCTG                              |
| <u>Template</u>   |             |                                                                                       |
|                   |             | <u>Listed 3' to 5'</u>                                                                |
| T1                | 49          | GCGGTCCCAAAGGGTCAGTGCTGGGCAAAATGTTGCTGCACTGACCCG                                      |
| T2                | 57          | GCTGGCACGGAATCCCAATCCCAATCCCAATCCCAATCCCGGTGGAGGACG                                   |
| T3                | 56          | GCTGGCACGGTCGGATTTGTGAACGGGCACGGTGGTAGGGCTGCGGTGGAGGACG                               |
| T4                | 86          | GATCTTGACTCACGGTCTATCGTAATCCCAATCCCAATCCCAATCCCAATCCCAATCCAGGCTAGCGGTGAGCGCACGGATCGCG |
